# Supplementary material for: Investigating demic versus cultural diffusion and sex bias in the spread of Austronesian languages in Vietnam
Source: PLoS One. 2024 Jun 17;19(6):e0304964. doi: 10.1371/journal.pone.0304964 (PMC11182502; doi:10.1371/journal.pone.0304964)
Supplement: S1 Table — (XLSX) [file pone.0304964.s006.xlsx]

## Sheet:  S1 Table-mtDNA Freq MSEA ISEA 
S1 Table: Population information and haplogroup frequencies for mtDNA
	Country	Vietnam																											Cambodia		Thailand	Taiwan										Philippines
	References	This study										Duong et al., 2018																	Kloss-Brandstätter et al., 2021		Woravatin et al., 2023	Ko et al., 2014										Delfin et al., 2014
	Number in map	3	4	5	6	7	9	11	12	13	14	1	2	8	10	17	18	19	20	21	22	23	24	25	26	27	28	29	15	16	30	31	32	33	34	35	36	37	38	39	40	41	42	43	44	45	46	47	48
	Population	Hre	Bana	Mnong	Ma	Coho	Giarai-II	Ede-II	Churu	Raglay	Cham-VN	Kinh	Mang	Giarai-I	Ede-I	Tay	Thai	Nung	Colao	Lachi	Pathen	Hmong	Dao	Lahu	Hanhi	Phula	Lolo	Sila	Cham-CB-Bat	Cham-CB-Kam	South-Thailand	Ami	Atayal	Bunun	Paiwan	Makatao	Puyuma	Rukai	Saisiat	Tao	Tsou	Abaknon	Aeta	Bugkalot	Ibaloi	Ifugao	Ivatan	Kalangoya	Kanaknaey
	Sample size	30	36	53	26	46	37	43	44	37	17	49	36	27	24	47	24	37	34	36	36	41	43	31	33	35	36	29	17	41	23	50	50	50	50	50	39	50	24	44	48	30	22	30	25	29	27	26	30
Haplogroup	Pop code	HREN	BANAN	MNON	MAN	COHON	GIRAN	EDEN	CHRUN	RAGLN	CHAN	Kinh	Mang	Giarai	Ede	Tay	Thai	Nung	Colao	Lachi	Pathen	Hmong	Dao	Lahu	Hanhi	Phula	Lolo	Sila	C	C	MST	AMI	ATA	BUN	PAI	MAK	PUY	RUK	SAI	TAO	TSO	Aba	AeB	Bug	Iba	Ifu	Iva	Kla	Kny
A+152C! +16362C		-	-	-	-	-	-	-	-	-	-	-	-	-	-	-	-	-	0.0294118	-	-	-	-	-	-	-	-	-	-	-	-	-	-	-	-	-	-	-	-	-	-	-	-	-	-	-	-	-	-
A+200		-	-	-	-	-	-	-	-	-	-	-	0.0555556	-	-	-	-	-	-	-	-	-	-	-	-	-	-	-	-	-	-	-	-	-	-	-	-	-	-	-	-	-	-	-	-	-	-	-	-
A13		-	-	-	-	-	-	-	-	-	-	-	-	-	-	-	-	-	-	-	-	-	-	-	-	0.0571429	-	-	-	-	-	-	-	-	-	-	-	-	-	-	-	-	-	-	-	-	-	-	-
A14		-	-	-	-	-	-	-	-	-	-	-	-	-	-	-	-	-	-	-	0.25	-	-	-	-	-	-	-	-	-	-	-	-	-	-	-	-	-	-	-	-	-	-	-	-	-	-	-	-
A15a		-	-	-	-	-	-	-	-	-	-	-	-	-	-	-	-	-	-	-	-	-	-	-	-	-	-	-	-	-	-	-	-	-	-	0.02	-	-	-	-	-	-	-	-	-	-	-	-	-
A17		-	-	-	-	-	-	-	-	-	-	-	-	-	-	-	-	-	-	-	-	-	-	-	0.0606061	0.114286	-	-	-	-	-	-	-	-	-	-	-	-	-	-	-	-	-	-	-	-	-	-	-
A5b1		-	-	-	-	-	-	-	-	-	-	-	-	-	-	0.0212766	-	-	-	-	-	-	-	-	-	-	-	-	-	-	-	-	-	-	-	-	-	-	-	-	-	-	-	-	-	-	-	-	-
A5b1c1		-	-	-	-	-	-	-	-	-	-	-	-	-	-	-	-	-	-	-	-	-	-	-	-	-	-	-	-	-	-	-	-	0.02	0.02	-	-	-	-	-	-	-	-	-	-	-	-	-	-
B4		-	-	-	-	-	-	-	-	-	-	-	-	-	-	-	-	-	-	-	-	-	-	-	-	-	0.222222	-	-	-	-	-	-	-	-	-	-	-	-	-	-	-	-	-	-	-	-	-	-
B4a		-	-	-	-	-	-	-	-	-	-	-	-	-	-	-	-	-	-	-	-	-	-	-	-	-	-	-	-	-	-	-	-	-	-	-	-	-	-	-	-	-	-	-	-	-	-	-	-
B4a1a		-	-	-	-	-	-	-	-	-	-	-	-	-	-	-	-	-	-	-	-	-	-	-	-	-	-	-	-	-	-	0.02	-	-	0.08	-	-	0.04	-	-	0.0833333	0.133333	-	-	0.04	-	-	0.0384615	0.133333
B4a1a1		-	-	-	-	-	-	-	-	-	-	-	-	-	-	-	-	-	-	-	-	-	-	-	-	-	-	-	-	-	-	-	-	-	-	-	-	-	-	-	-	-	-	-	-	-	-	-	-
B4a1a3a1		-	-	-	-	-	-	-	-	-	-	-	-	-	-	-	-	-	-	-	-	-	-	-	-	-	-	-	-	-	-	-	-	-	-	-	-	-	-	-	-	-	-	-	-	-	0.0740741	-	-
B4a1a3a1a		-	-	-	-	-	-	-	-	-	-	-	-	-	-	-	-	-	-	-	-	-	-	-	-	-	-	-	-	-	-	0.12	-	-	-	-	-	-	-	-	-	-	-	-	-	-	-	-	-
B4a1a4		-	-	-	-	-	-	-	-	-	-	-	-	-	-	-	-	-	-	-	-	-	-	-	-	-	-	-	-	-	-	-	-	-	-	-	-	-	-	-	-	-	-	-	-	-	0.0740741	-	-
B4a1a5		-	-	-	-	-	-	-	-	-	-	-	-	-	-	-	-	-	-	-	-	-	-	-	-	-	-	-	-	-	-	-	-	-	-	-	-	-	-	-	-	-	-	-	-	-	0.037037	0.0384615	-
B4a1a5a		-	-	-	-	-	-	-	-	-	-	-	-	-	-	-	-	-	-	-	-	-	-	-	-	-	-	-	-	-	-	-	-	-	-	-	-	-	-	-	-	-	-	-	0.04	0.0344828	-	-	-
B4a1a6		-	-	-	-	-	-	-	-	-	-	-	-	-	-	-	-	-	-	-	-	-	-	-	-	-	-	-	-	-	-	-	-	-	-	-	-	-	-	-	-	-	-	-	0.04	0.137931	-	0.115385	0.0333333
B4a1a6a		-	-	-	-	-	-	-	-	-	-	-	-	-	-	-	-	-	-	-	-	-	-	-	-	-	-	-	-	-	-	-	-	-	-	-	-	-	-	-	-	-	-	-	0.08	-	-	0.0769231	-
B4a1a7		-	-	-	-	-	-	-	-	-	-	-	-	-	-	-	-	-	-	-	-	-	-	-	-	-	-	-	-	-	-	0.08	-	-	-	-	-	-	-	-	-	-	-	-	-	-	-	-	-
B4a1c		-	-	-	-	-	-	-	-	-	-	-	-	-	-	0.0212766	-	-	-	-	-	-	-	-	-	-	-	-	-	-	-	-	-	-	-	-	-	-	-	-	-	-	-	-	-	-	-	-	-
B4a1c+146T!		-	-	0.0188679	-	-	-	-	-	-	-	-	-	-	-	-	-	-	-	-	-	-	-	-	-	-	-	-	-	-	-	-	-	-	-	-	-	-	-	-	-	-	-	-	-	-	-	-	-
B4a1c2		-	-	-	-	-	-	-	-	-	-	-	-	-	-	-	-	-	0.0294118	-	-	-	-	-	-	-	-	-	-	-	-	-	-	-	-	-	-	-	-	-	-	-	-	-	-	-	-	-	-
B4a1c4		-	-	-	-	-	-	-	-	-	-	0.0408163	-	-	-	0.0212766	-	0.027027	-	-	-	-	0.0697674	-	0.0606061	-	-	0.0689655	-	-	-	-	-	-	-	-	-	-	-	-	-	-	-	-	-	-	-	-	-
B4a1e		-	-	-	-	-	-	-	-	-	-	-	-	-	-	-	0.0833333	-	-	-	-	-	-	-	-	-	-	-	-	-	-	-	-	-	-	0.02	-	-	-	-	-	-	-	-	-	-	-	-	-
B4a2a		-	-	-	-	-	-	-	-	-	-	-	-	-	-	-	-	-	-	-	-	-	-	-	-	-	-	-	-	-	-	-	-	-	-	0.02	-	-	-	-	-	-	-	-	-	-	-	-	-
B4a2a1		-	-	-	-	-	-	-	-	-	-	-	-	-	-	-	-	-	-	-	-	-	-	-	-	-	-	-	-	-	-	-	-	-	-	-	-	-	-	0.159091	-	-	-	-	-	-	-	-	-
B4a2a2		-	-	-	-	-	-	-	-	-	-	-	-	-	-	-	-	-	-	-	-	-	-	-	-	-	-	-	-	-	-	-	0.04	-	-	-	-	-	0.0416667	-	-	-	-	-	-	-	-	-	-
B4a2a3		-	-	-	-	-	-	-	-	-	-	-	-	-	-	-	-	-	-	-	-	-	-	-	-	-	-	-	-	-	-	-	-	-	0.24	-	-	0.04	-	-	-	-	-	-	-	-	-	-	-
B4a5		-	-	-	-	-	-	-	-	-	-	-	-	-	-	-	-	-	0.0294118	-	-	0.146341	0.0697674	-	-	-	-	-	-	-	-	-	-	-	-	-	-	-	-	-	-	-	-	-	-	-	-	-	-
B4b1a		-	0.0555556	-	-	-	-	-	-	-	-	-	-	-	-	-	-	-	-	-	-	-	-	-	-	-	-	-	-	-	-	-	-	-	-	-	-	-	-	-	-	-	-	-	-	-	-	-	-
B4b1a2		-	-	-	-	-	-	-	-	-	-	-	-	-	-	0.0212766	-	-	-	-	-	-	-	-	-	-	-	-	0.117647	-	-	-	-	-	-	-	-	-	-	-	-	0.1	0.5	-	-	0.103448	-	-	0.1
B4b1a2a		-	-	-	-	-	-	-	-	-	-	-	-	-	-	0.0212766	-	0.0540541	0.0294118	-	-	-	-	-	-	-	-	-	-	-	-	-	-	-	-	0.02	-	-	-	-	-	-	-	-	-	-	-	-	-
B4b1a2b1		-	-	-	-	-	-	-	-	-	-	-	-	-	-	-	-	-	-	-	-	-	-	-	-	-	-	-	-	-	-	-	-	-	-	-	-	-	-	-	-	-	-	-	-	-	-	-	-
B4b1a2b2		-	-	-	-	-	-	-	-	-	-	-	-	-	-	-	-	-	-	-	-	-	-	-	-	-	-	-	-	-	-	-	-	0.02	-	0.06	-	-	-	-	-	-	-	-	-	-	-	-	-
B4b1a2c		-	-	-	-	-	-	-	-	-	-	-	-	-	-	-	-	-	-	-	-	-	-	-	-	-	-	-	-	-	-	-	-	-	-	-	-	-	-	-	-	-	-	-	-	-	-	-	-
B4b1a2d		-	-	-	-	-	-	-	-	-	-	-	-	-	-	-	-	-	-	-	-	-	-	-	-	-	-	-	-	-	-	-	-	-	-	-	-	-	-	-	-	-	-	-	-	-	-	-	-
B4b1a2f		-	-	-	-	-	-	-	-	-	-	-	-	-	-	-	-	-	-	-	-	-	-	-	-	-	-	-	-	-	-	-	0.02	0.06	-	-	-	-	-	-	0.0833333	-	-	-	-	-	-	-	-
B4b1a2g		-	-	-	-	-	-	-	-	-	-	-	-	-	-	-	-	-	-	-	-	-	-	-	-	-	-	-	-	-	-	-	-	0.12	-	-	-	-	-	-	0.0208333	-	-	-	-	-	-	-	-
B4b1a2g1		-	-	-	-	-	-	-	-	-	-	-	-	-	-	-	-	-	-	-	-	-	-	-	-	-	-	-	-	-	-	-	-	0.14	-	-	-	-	-	-	-	-	-	-	-	-	-	-	-
B4b1a2h		-	-	-	-	-	-	-	-	-	-	-	-	-	-	-	-	-	-	-	-	-	-	-	-	-	-	-	-	-	-	0.08	-	-	-	-	-	-	-	-	-	-	-	-	-	-	-	-	-
B4b1c1		-	-	-	-	-	-	-	-	-	-	0.0408163	-	-	-	0.0212766	-	0.027027	-	-	-	-	-	-	-	-	-	-	-	-	-	-	-	-	-	-	-	-	-	-	-	-	-	-	-	-	-	-	-
B4c		-	-	-	-	-	-	-	-	-	-	-	-	-	-	-	-	-	-	0.25	-	-	-	0.129032	-	-	0.166667	-	-	-	-	-	-	-	-	-	-	-	-	-	-	-	-	-	-	-	-	-	-
B4c1a		-	-	-	-	-	-	-	-	-	-	-	-	-	-	-	-	-	-	-	-	-	-	0.193548	-	-	-	-	-	-	-	-	-	-	-	-	-	-	-	-	-	-	-	-	-	-	-	-	-
B4c1b+16335G		-	-	-	-	-	-	-	-	-	-	-	-	-	-	0.0212766	-	-	-	-	-	-	-	-	-	-	-	-	-	-	-	-	-	-	-	-	-	-	-	-	-	-	-	-	-	-	-	-	-
B4c1b2a		-	-	-	-	-	-	-	-	-	-	-	-	-	-	0.0212766	-	-	-	-	-	-	-	-	-	-	-	-	-	-	-	-	-	-	-	-	-	-	-	-	-	-	-	-	-	-	-	-	-
B4c1b2a2		-	-	-	-	-	-	-	-	-	-	-	-	-	-	-	-	-	-	-	-	-	-	-	-	-	-	-	-	-	0.0434783	-	-	-	-	-	-	-	-	0.0227273	-	0.0666667	-	-	-	-	-	-	-
B4c1b2a2a		-	-	-	-	-	-	-	-	-	-	-	-	-	-	-	-	-	-	-	-	-	-	-	-	-	-	-	-	-	-	-	-	-	-	-	-	-	-	0.340909	-	-	-	-	-	-	0.037037	-	-
B4c1b2a2b		-	-	-	-	-	-	-	-	-	-	-	-	-	-	-	-	-	-	-	-	-	-	-	-	-	-	-	-	-	-	-	-	-	-	-	-	-	-	-	-	-	-	-	-	-	0.111111	-	-
B4c1b2c		-	-	-	-	-	-	-	-	-	-	-	-	-	-	0.0212766	-	-	-	-	-	-	-	-	-	0.0571429	-	-	-	-	-	-	-	-	-	-	-	-	-	-	-	-	-	-	-	-	-	-	-
B4c1b2c2		-	-	-	-	-	-	-	-	-	-	0.0204082	-	-	-	-	-	-	-	-	-	-	-	0.0322581	-	-	-	-	-	-	-	-	-	-	-	-	-	-	-	-	-	-	-	-	-	-	-	-	-
B4c2		-	0.0555556	-	-	0.0217391	-	-	0.0454545	-	0.0588235	-	-	-	-	-	-	-	-	-	-	-	-	0.258065	0.030303	-	-	-	0.0588235	-	0.173913	-	-	-	-	-	-	-	-	-	-	-	-	-	-	-	-	-	-
B4c2b		-	-	-	-	-	-	-	-	-	-	-	-	-	-	-	-	-	-	-	-	-	-	-	-	-	-	-	-	-	-	-	-	-	-	-	-	-	-	-	-	-	-	-	-	-	-	-	-
B4c2c		-	-	-	-	-	-	-	-	-	-	-	-	-	-	0.0212766	-	0.027027	-	-	-	-	0.0232558	-	-	-	-	-	-	-	-	-	-	-	-	-	-	-	-	-	-	-	-	-	-	-	-	-	-
B4e		-	-	-	-	-	-	-	-	-	-	-	-	-	-	-	-	-	-	-	-	-	-	0.0322581	-	-	-	-	-	-	-	-	-	-	-	-	-	-	-	-	-	-	-	-	-	-	-	-	-
B4g1		0.0333333	-	-	-	-	-	-	-	-	-	-	-	-	-	-	-	-	-	-	-	-	-	-	-	-	0.138889	-	-	-	-	-	-	-	-	-	-	-	-	-	-	-	-	-	-	-	-	-	-
B4g1a		-	-	-	-	-	-	-	-	-	-	-	-	-	-	-	0.0833333	0.027027	-	-	-	-	-	-	-	-	-	-	-	-	-	-	-	-	-	-	-	-	-	-	-	-	-	-	-	-	-	-	-
B4g2		-	-	-	-	-	-	-	-	-	-	-	-	-	-	-	-	-	0.0294118	-	-	-	0.0232558	-	-	-	-	0.0344828	-	-	-	-	-	-	-	-	-	-	-	0.0227273	-	-	-	-	-	-	-	-	-
B4h		-	-	-	-	-	-	-	-	-	-	0.0204082	-	-	-	0.0212766	-	-	-	-	-	-	0.0697674	-	-	-	-	-	-	0.0243902	-	-	-	-	-	-	-	-	-	-	-	-	-	-	-	-	-	-	-
B4m		-	-	-	-	-	-	-	-	-	-	0.0204082	-	-	-	0.0212766	-	-	-	-	-	-	-	-	-	-	-	-	-	-	-	-	-	-	-	-	-	-	-	-	-	-	-	-	-	-	-	-	-
B5a		-	-	-	-	-	-	-	-	-	-	0.0204082	-	-	-	-	-	-	-	-	-	-	-	-	-	-	-	-	-	-	-	-	-	-	-	-	-	-	-	-	-	-	-	-	-	-	-	-	-
B5a1		0.0333333	-	-	-	-	-	-	-	-	-	-	-	-	-	-	-	-	-	-	-	-	-	-	-	-	-	-	-	-	-	-	-	-	-	-	-	-	-	-	-	-	-	-	-	-	-	-	-
B5a1a		0.0333333	0.0555556	0.0943396	-	0.0217391	-	0.0232558	0.0681818	0.027027	0.0588235	0.0204082	-	-	0.166667	0.0425532	-	0.027027	0.0294118	-	-	-	-	-	-	-	0.0833333	-	0.294118	0.170732	0.0434783	-	-	-	-	-	-	-	-	-	-	-	-	-	-	-	-	-	-
B5a1b1		-	-	0.0188679	0.0769231	0.217391	0.0540541	-	-	-	0.117647	0.0204082	0.0277778	-	-	-	-	-	-	-	-	-	-	-	-	-	-	-	0.0588235	0.0243902	-	-	-	-	-	-	-	-	-	-	-	-	-	-	-	-	-	-	-
B5a1c		-	-	0.0188679	-	-	-	-	0.0227273	-	-	-	-	-	-	-	-	-	-	-	-	-	-	-	-	-	-	-	-	-	-	-	-	-	-	-	-	-	-	-	-	-	-	-	-	-	-	-	-
B5a1c1a		-	-	-	-	-	-	-	-	-	-	-	-	-	-	-	-	-	0.147059	-	-	0.0487805	0.0232558	-	-	-	-	-	-	-	-	-	-	-	-	-	-	-	-	-	-	-	-	-	-	-	-	-	-
B5a1c1a1		-	-	-	-	-	-	-	-	-	-	-	-	-	-	-	-	-	0.0294118	-	0.0555556	0.195122	-	-	-	0.0285714	-	-	-	-	-	-	-	-	-	-	-	-	-	-	-	-	-	-	-	-	-	-	-
B5a1d		0.2	-	-	0.115385	0.0217391	0.108108	0.139535	0.0454545	-	-	-	-	0.037037	0.0833333	0.0212766	-	-	-	-	-	-	-	0.0322581	-	-	-	-	-	0.0731707	-	-	-	-	-	-	-	-	-	-	-	0.0333333	-	-	-	-	-	-	-
B5a2a2a1		-	-	-	-	-	-	-	-	-	-	-	-	-	-	-	-	-	-	-	-	-	-	-	-	-	-	-	-	-	-	0.02	-	-	0.08	-	0.025641	0.06	-	-	-	-	-	-	-	-	-	-	-
B5a2a2a2		-	-	-	-	-	-	-	-	-	-	-	-	-	-	-	-	-	-	-	-	-	-	-	-	-	-	-	-	-	-	-	-	-	-	-	-	0.02	0.166667	-	-	-	-	-	-	-	-	-	-
B5a2a2b1		-	-	-	-	-	-	-	-	-	-	-	-	-	-	-	-	-	-	-	-	-	-	-	-	-	-	-	-	-	-	-	-	0.02	-	-	-	-	-	-	0.0208333	-	-	-	-	-	0.037037	-	-
B5a2a2b1a		-	-	-	-	-	-	-	-	-	-	-	-	-	-	-	-	-	-	-	-	-	-	-	-	-	-	-	-	-	-	-	-	0.1	-	-	-	-	-	-	-	-	-	-	-	-	-	-	-
B5a2a2b2		-	-	-	-	-	-	-	-	-	-	-	-	-	-	-	-	-	-	-	-	-	-	-	-	-	-	-	-	-	-	-	-	-	-	0.04	-	-	-	-	-	-	-	-	-	-	-	-	-
B5b1		-	-	-	-	-	-	-	-	-	-	0.0204082	-	-	-	-	-	-	-	-	-	-	-	-	-	-	-	-	-	-	-	-	-	-	-	-	-	-	-	-	-	-	-	-	-	-	-	-	-
B5b1c		-	-	-	-	-	-	-	-	-	-	-	-	-	-	-	-	-	-	-	-	-	-	-	-	-	-	-	-	-	-	-	-	-	-	-	-	-	-	-	-	0.1	-	0.0333333	-	-	0.0740741	-	-
B5b1c1		-	-	-	-	-	-	-	-	-	-	-	-	-	-	-	-	-	-	-	-	-	-	-	-	-	-	-	-	-	-	-	-	-	-	-	-	-	-	-	-	-	-	-	0.04	0.0689655	-	0.115385	0.0333333
B5b1c1a		-	-	-	-	-	-	-	-	-	-	-	-	-	-	-	-	-	-	-	-	-	-	-	-	-	-	-	-	-	-	-	-	-	-	-	-	-	-	-	-	0.0333333	-	-	0.04	0.137931	-	0.115385	0.133333
B5b2		-	-	-	-	-	-	-	-	-	-	0.0204082	-	-	-	-	-	-	-	-	-	-	-	-	-	-	-	-	-	-	-	-	-	-	-	-	-	-	-	-	-	-	-	-	-	-	-	-	-
B5b2a2a2		-	-	-	-	-	-	-	-	-	-	-	-	-	-	-	-	-	-	-	-	-	-	-	-	-	-	-	-	-	-	-	-	-	-	-	-	-	-	-	-	-	-	-	-	-	-	-	-
B5b2c		-	-	-	-	-	-	-	-	-	-	-	-	-	-	-	-	-	-	-	-	-	-	-	-	-	-	-	-	-	-	-	-	-	-	0.02	-	-	-	-	-	-	-	-	-	-	-	-	-
B6		-	-	-	-	-	-	-	-	-	-	-	-	-	-	-	-	-	0.0294118	-	-	-	0.0465116	-	-	-	-	-	-	-	-	-	-	-	-	-	-	-	-	-	-	-	-	-	-	-	-	-	-
B6a		-	-	-	-	-	-	-	-	-	-	0.0204082	-	-	-	-	-	0.0540541	-	0.166667	-	-	0.0465116	-	-	-	-	-	-	-	-	-	-	-	-	-	-	-	-	-	-	-	-	-	-	-	-	-	-
B6a1a		-	-	-	-	-	-	-	-	-	-	-	-	-	-	-	-	-	-	-	-	-	-	-	-	-	-	-	-	-	-	-	-	-	-	-	-	-	-	-	-	-	-	-	-	-	-	-	-
C4a2b		-	-	-	-	-	-	-	-	-	-	-	-	-	-	-	-	-	-	-	-	-	-	0.0322581	0.0909091	-	-	-	-	-	-	-	-	-	-	-	-	-	-	-	-	-	-	-	-	-	-	-	-
C5d		-	-	-	-	-	-	-	-	-	-	-	-	-	-	-	-	-	-	-	-	0.121951	-	-	-	-	-	-	-	-	-	-	-	-	-	-	-	-	-	-	-	-	-	-	-	-	-	-	-
C7		0.0666667	0.0833333	-	-	-	0.027027	-	-	-	-	0.0204082	-	-	-	0.0212766	0.0416667	-	-	-	-	-	-	-	-	-	-	-	-	0.0243902	-	-	-	-	-	-	-	-	-	-	-	-	-	-	-	-	-	-	-
C7a		-	-	-	-	-	-	-	-	-	-	0.0408163	-	-	-	-	0.0833333	-	0.0588235	0.0555556	-	-	0.0697674	-	0.121212	0.0571429	-	-	-	-	-	-	-	-	0.04	-	-	-	-	-	-	-	-	-	-	-	-	-	-
C7a1		-	-	-	-	-	-	-	-	-	-	-	-	-	-	-	-	0.027027	-	-	-	-	-	-	-	-	-	-	-	-	-	-	-	-	-	0.02	-	-	-	-	-	-	-	-	-	-	-	-	-
C7a2		-	-	-	-	-	-	-	-	-	-	0.0204082	-	-	-	0.0212766	-	0.0810811	-	-	0.111111	-	0.0232558	-	-	-	-	-	-	-	-	-	-	-	-	-	-	-	-	-	-	-	-	-	-	-	-	-	-
C7a2a		-	-	-	-	-	-	-	-	-	-	-	-	-	-	-	-	-	-	-	-	-	-	-	-	-	-	-	-	-	-	-	-	-	-	0.02	-	-	-	-	-	-	-	-	-	-	-	-	-
D4		-	-	-	-	-	-	-	-	-	-	-	-	-	-	-	-	-	-	0.0555556	-	0.0731707	-	-	-	0.0285714	-	-	-	-	-	-	-	-	-	-	-	-	-	-	-	-	-	-	-	-	-	-	-
D4a		-	-	-	-	-	-	-	-	-	-	-	0.111111	-	-	-	-	-	-	-	-	-	-	-	-	-	-	-	-	-	-	-	-	-	-	-	-	-	-	-	-	-	-	-	-	-	-	-	-
D4a1		-	-	-	-	-	-	-	-	-	-	-	-	-	-	-	-	-	-	-	-	-	-	-	-	-	-	-	-	-	-	-	-	-	-	0.02	-	-	-	-	-	-	-	-	-	-	-	-	-
D4a7		-	-	-	-	-	-	-	-	-	-	0.0204082	-	-	-	-	-	-	-	-	-	-	-	-	-	-	-	-	-	-	-	-	-	-	-	-	-	-	-	-	0.0208333	-	-	-	-	-	-	-	-
D4b2b2a		-	-	-	-	-	-	-	-	-	-	-	-	-	-	-	-	-	-	0.0555556	-	-	-	-	-	-	-	-	-	-	-	-	-	-	-	-	-	-	-	-	-	-	-	-	-	-	-	-	-
D4e1a3		-	-	-	-	-	-	-	-	-	-	-	-	-	-	-	-	-	0.0294118	-	-	-	-	-	-	0.0285714	-	-	-	-	-	-	-	-	-	-	-	-	-	-	-	-	-	-	-	-	-	-	-
D4g2a1		-	-	-	-	-	-	-	-	-	-	-	-	-	-	-	0.0416667	-	-	-	-	-	-	-	-	-	-	-	-	-	-	-	-	-	-	-	-	-	-	-	-	-	-	-	-	-	-	-	-
D4g2a1b		-	-	-	-	-	-	-	-	-	-	-	-	-	-	-	0.0416667	-	-	-	-	-	-	-	-	-	-	-	-	-	-	-	-	-	-	-	-	-	-	-	-	-	-	-	-	-	-	-	-
D4i3		-	-	-	-	-	-	-	-	-	-	-	-	-	-	-	-	-	-	-	-	-	-	-	-	-	-	-	-	-	-	-	0.02	-	-	-	-	-	-	-	-	-	-	-	-	-	-	-	-
D4j1a1		-	-	-	-	-	-	-	-	-	-	-	-	-	-	-	-	-	-	-	-	-	-	0.0645161	-	-	-	-	-	-	-	-	-	-	-	-	-	-	-	-	-	-	-	-	-	-	-	-	-
D4j3		-	-	-	-	-	-	-	-	-	-	-	-	-	-	-	-	-	-	-	-	-	-	-	-	0.0285714	-	-	-	-	-	-	-	-	-	-	-	-	-	-	-	-	-	-	-	-	-	-	-
D4s		-	-	-	-	-	-	-	-	-	-	-	-	-	-	-	-	-	-	-	-	-	-	-	0.121212	-	-	0.137931	-	-	-	-	-	-	-	-	-	-	-	-	-	-	-	-	-	-	-	-	-
D5a2a1		-	-	-	-	-	0.0540541	-	-	-	-	-	-	-	-	-	-	-	-	-	-	-	-	-	0.030303	-	-	-	-	-	-	-	-	-	-	-	-	-	-	-	-	-	-	-	-	-	-	-	-
D5a2a1b		-	-	-	-	-	-	-	-	-	-	-	-	-	-	-	-	-	-	-	-	-	-	-	-	-	-	-	-	-	-	-	-	-	-	-	-	0.02	-	-	-	-	-	-	-	-	-	-	-
D5a2b		-	-	-	-	-	-	-	-	-	-	-	-	-	-	-	-	-	-	-	-	-	-	-	0.030303	-	-	0.0689655	-	-	-	-	-	-	-	-	-	-	-	-	-	-	-	-	-	-	-	-	-
D5b1c1		-	-	-	-	-	-	-	-	-	-	0.0204082	-	-	-	-	-	-	-	-	-	-	-	-	-	-	-	-	-	-	-	-	-	-	-	-	-	-	-	-	-	-	-	-	-	-	-	-	-
D5b1c1a		-	-	-	-	-	-	-	-	-	-	-	-	-	-	-	-	-	-	-	-	-	-	-	-	-	-	-	-	-	-	0.08	-	-	-	-	0.025641	-	-	-	-	-	-	-	0.12	0.0344828	-	-	0.0333333
D5b3		-	-	-	-	-	-	-	-	-	-	0.0204082	-	-	-	0.0425532	-	-	-	-	-	-	-	-	-	-	-	-	-	-	-	-	-	-	-	-	-	-	-	-	-	-	-	-	-	-	-	-	-
D5b3a		-	-	-	-	-	-	-	-	-	-	-	-	-	-	-	-	-	-	-	-	-	-	-	-	-	-	-	-	-	-	-	-	-	0.12	-	0.025641	0.12	-	-	-	-	-	-	-	-	-	-	-
D5b3a1		-	-	-	-	-	-	-	-	-	-	-	-	-	-	-	-	-	-	-	-	-	-	-	-	-	-	-	-	-	-	-	-	0.02	-	-	-	0.36	-	-	-	-	-	-	-	-	-	-	-
D5b4		-	-	-	-	-	-	-	-	-	-	0.0204082	-	-	-	0.0212766	-	-	0.0294118	-	-	-	-	-	-	-	-	-	-	-	-	-	-	-	-	0.02	-	-	-	-	-	-	-	-	-	-	-	-	-
D6a2		-	-	-	-	-	-	-	-	-	-	-	-	-	-	-	-	-	-	-	-	-	-	-	-	-	-	-	-	-	-	-	0.04	-	-	-	-	-	-	-	-	0.0333333	-	-	-	-	-	-	-
D6c1		-	-	-	-	-	-	-	-	-	-	-	-	-	-	-	-	-	-	-	-	-	-	-	-	-	-	-	-	-	-	-	-	-	-	-	-	-	-	-	-	-	-	-	-	-	-	-	-
D6c1a		-	-	-	-	-	-	-	-	-	-	-	-	-	-	-	-	-	-	-	-	-	-	-	-	-	-	-	-	-	-	-	-	-	-	-	-	-	-	-	-	-	-	-	-	-	-	-	-
E1a1a		-	-	-	-	-	-	-	-	-	-	-	-	-	-	-	-	-	-	-	-	-	-	-	-	-	-	-	-	-	-	-	0.02	-	-	-	-	-	-	-	-	-	-	-	-	-	-	-	-
E1a1a1		-	-	-	-	-	-	-	-	-	-	-	-	-	-	-	-	-	-	-	-	-	-	-	-	-	-	-	-	-	0.0434783	0.04	0.06	0.04	-	0.02	0.0512821	-	0.125	-	0.0416667	-	-	-	0.04	-	0.0740741	-	-
E1a1a1a		-	-	-	-	-	-	-	-	-	-	-	-	-	-	-	-	-	-	-	-	-	-	-	-	-	-	-	-	-	-	-	-	-	-	-	-	-	-	-	-	-	-	0.133333	-	-	-	-	0.0666667
E1a1a1b		-	-	-	-	-	-	-	-	-	-	-	-	-	-	-	-	-	-	-	-	-	-	-	-	-	-	-	-	-	-	-	-	-	-	0.06	-	-	-	-	-	-	-	-	-	-	-	-	-
E1a1a1b2		-	-	-	-	-	-	-	-	-	-	-	-	-	-	-	-	-	-	-	-	-	-	-	-	-	-	-	-	-	-	-	-	-	-	-	0.205128	-	-	-	-	-	-	-	-	-	-	-	-
E1a1a1c		-	-	-	-	-	-	-	-	-	-	-	-	-	-	-	-	-	-	-	-	-	-	-	-	-	-	-	-	-	-	-	-	-	-	-	-	-	-	-	-	0.2	-	-	-	-	-	-	-
E1a1c		-	-	-	-	-	-	-	-	-	-	-	-	-	-	-	-	-	-	-	-	-	-	-	-	-	-	-	-	-	-	0.1	-	-	-	-	-	-	-	-	-	-	-	-	-	-	-	-	-
E1a2+(16261T)		-	-	-	-	-	-	-	-	-	-	-	-	-	-	-	-	-	-	-	-	-	-	-	-	-	-	-	-	-	-	-	-	-	-	-	-	-	-	-	-	-	-	-	-	-	-	-	-
E2a		-	-	-	-	-	-	-	-	-	0.0588235	-	-	-	-	-	-	-	-	-	-	-	-	-	-	-	-	-	-	-	-	-	-	-	-	-	-	-	-	-	-	-	-	-	-	-	-	-	-
E2a1a		-	-	-	-	-	-	-	-	-	-	-	-	-	-	-	-	-	-	-	-	-	-	-	-	-	-	-	-	-	-	-	-	-	-	-	-	-	-	-	-	-	-	-	-	-	-	-	-
E2b		-	-	-	-	-	-	-	-	-	-	-	-	-	-	-	-	-	-	-	-	-	-	-	-	-	-	-	-	-	-	-	0.08	-	0.02	0.06	0.025641	-	0.0416667	0.0227273	-	-	-	-	-	-	-	-	-
E2b1		-	-	-	-	-	-	-	-	-	-	-	-	-	-	-	-	-	-	-	-	-	-	-	-	-	-	-	-	-	-	-	-	0.02	-	-	-	-	-	-	0.0208333	-	-	-	-	-	-	-	-
E2b2		-	-	-	-	-	-	-	-	-	-	-	-	-	-	-	-	-	-	-	-	-	-	-	-	-	-	-	-	-	-	0.02	-	-	-	-	0.0512821	-	-	-	-	-	-	-	-	-	-	-	-
F1+16189T!		-	-	-	-	-	-	-	-	-	-	-	-	-	-	-	-	-	-	-	-	-	-	-	-	-	-	-	-	0.0487805	-	-	-	-	-	-	-	-	-	-	-	-	-	-	-	-	-	-	-
F1a		-	-	-	-	-	-	-	-	-	-	0.0408163	-	-	-	0.0212766	-	-	-	-	-	-	-	-	0.030303	-	-	-	-	-	-	-	-	-	-	-	-	-	-	-	-	-	-	-	-	-	-	-	-
F1a'c'f		-	-	-	-	-	-	-	-	-	-	-	-	-	-	0.0212766	-	-	-	-	-	-	-	-	-	0.0285714	-	-	-	-	-	-	-	-	-	-	-	-	-	-	-	-	-	-	-	-	-	-	-
F1a1		-	-	-	-	-	-	-	-	0.0540541	-	-	0.277778	-	-	-	-	-	0.0294118	-	-	-	-	0.0322581	-	-	-	-	-	-	-	-	-	-	-	-	-	-	-	-	-	-	-	-	-	-	-	-	-
F1a1a		0.0666667	-	-	-	0.0434783	-	0.0465116	0.136364	0.0810811	0.176471	0.0204082	-	-	-	0.0851064	0.0416667	-	0.0588235	-	0.0277778	0.0487805	0.162791	0.0322581	0.0909091	-	-	0.586207	-	-	-	-	-	-	-	-	-	-	-	-	-	-	-	-	-	-	-	-	-
F1a1a1		-	0.0555556	0.0377358	0.0769231	0.0434783	-	0.162791	0.0227273	0.0810811	0.176471	0.0204082	-	-	-	-	-	-	-	-	-	-	-	0.0322581	0.030303	0.0285714	-	-	0.0588235	0.121951	0.0434783	-	-	-	-	-	-	-	-	-	-	-	-	-	-	-	-	-	-
F1a1d		0.0333333	0.0555556	-	-	-	0.108108	-	-	-	-	-	-	0.037037	-	0.0425532	0.0416667	-	-	-	-	-	-	-	-	-	-	-	-	-	-	-	-	0.04	0.02	-	-	0.02	-	-	0.0833333	-	-	-	-	-	-	-	-
F1a1d1		-	-	-	-	-	-	-	-	-	-	-	-	-	-	-	-	-	-	-	-	-	-	-	-	-	-	-	-	-	-	-	-	-	-	-	-	-	-	0.340909	-	-	-	-	-	-	-	-	-
F1a2		-	-	-	-	-	-	-	-	-	-	-	-	-	-	-	-	-	-	-	-	0.0243902	-	-	-	-	-	-	-	-	-	-	-	-	-	-	-	-	-	-	-	-	-	-	-	-	-	-	-
F1a2a		-	-	-	-	-	-	-	-	-	-	-	-	-	-	-	0.0416667	-	-	-	-	-	-	-	-	-	-	-	-	-	-	-	-	-	-	-	-	-	-	-	-	-	-	-	-	-	-	-	-
F1a3+16311T!		-	-	-	-	-	-	-	-	-	-	-	-	-	-	-	-	-	-	-	-	-	-	-	-	-	-	-	-	-	-	-	-	-	-	-	-	0.02	-	-	-	-	-	-	-	-	-	-	-
F1a3a		-	-	-	-	-	-	-	-	-	-	-	-	-	-	-	-	-	-	-	-	-	-	-	-	-	-	-	-	-	-	-	-	0.02	-	-	0.025641	-	-	-	-	-	-	-	-	-	-	-	-
F1a3a1		-	-	-	-	-	-	-	-	-	-	-	-	-	-	-	-	-	-	-	-	-	-	-	-	-	-	-	-	-	-	-	-	-	-	-	0.153846	-	-	-	-	0.0333333	0.0454545	-	-	-	-	-	-
F1a3a2		-	-	-	-	-	-	-	-	-	-	-	-	-	-	-	-	-	-	-	-	-	-	-	-	-	-	-	-	-	-	-	-	-	-	-	-	-	-	-	-	-	-	-	-	-	0.111111	-	-
F1a3a3		-	-	-	-	-	-	-	-	-	-	-	-	-	-	-	-	-	-	-	-	-	-	-	-	-	-	-	-	-	-	-	-	-	-	0.02	-	-	-	-	-	-	-	-	-	-	0.0740741	-	-
F1a3a3a		-	-	-	-	-	-	-	-	-	-	-	-	-	-	-	-	-	-	-	-	-	-	-	-	-	-	-	-	-	-	-	-	0.02	-	-	-	-	-	-	0.0833333	-	-	-	-	-	-	-	-
F1a3b		-	-	-	-	-	-	-	-	-	-	-	-	-	-	-	-	-	-	-	-	-	-	-	-	-	-	-	-	-	-	-	-	-	-	0.02	-	-	-	-	-	-	-	-	-	-	-	-	-
F1a4a		-	-	-	-	-	-	-	-	-	-	-	-	0.037037	-	-	-	-	-	-	-	-	-	-	-	-	-	-	-	-	-	-	-	-	-	-	-	-	-	-	-	-	-	-	-	-	-	-	-
F1a4a1		-	-	-	-	-	-	-	-	-	-	-	-	-	-	-	-	-	-	-	-	-	0.0232558	-	-	-	-	-	-	-	-	0.02	-	0.02	-	0.04	-	-	-	-	0.104167	0.0666667	-	0.133333	0.08	-	-	0.0384615	-
F1b1c		-	-	-	-	-	-	-	-	-	-	-	-	-	-	-	-	-	-	0.25	-	-	-	-	-	-	0.111111	-	-	-	-	-	-	-	-	-	-	-	-	-	-	-	-	-	-	-	-	-	-
F1c1a1		-	-	-	-	-	-	-	-	-	-	-	-	-	-	-	0.0833333	0.027027	-	0.0277778	0.0277778	-	-	-	-	-	-	-	-	-	-	-	-	-	-	-	-	-	-	-	-	-	-	-	-	-	-	-	-
F1d		-	-	-	-	-	-	-	-	-	-	-	-	-	-	-	-	-	-	-	0.138889	-	-	-	-	-	-	-	-	-	-	-	-	-	-	-	-	-	-	-	-	-	-	-	-	-	-	-	-
F1e3		-	-	-	-	-	-	-	-	-	-	0.0408163	-	-	-	0.0212766	-	-	-	-	-	-	-	-	-	-	-	-	-	-	-	-	-	-	-	-	-	-	-	-	-	-	-	-	-	-	-	-	-
F1f		-	-	-	-	0.0217391	-	-	-	-	-	0.0204082	-	-	0.0416667	0.0212766	0.0416667	0.027027	-	-	-	0.0243902	-	-	-	-	0.222222	-	0.0588235	-	0.0434783	-	-	-	-	-	-	-	-	-	-	-	-	-	-	-	-	-	-
F1g		-	-	-	-	-	-	-	-	-	-	0.0612245	-	-	-	-	-	-	-	-	-	-	-	-	-	0.0285714	-	-	-	-	-	-	-	-	-	-	-	-	-	-	-	-	-	-	-	-	-	-	-
F1g1		-	-	-	-	-	-	-	-	-	-	-	-	-	-	-	-	-	-	-	-	0.0243902	0.0232558	-	-	-	-	-	-	-	-	-	-	-	-	-	-	-	-	-	-	-	-	-	-	-	-	-	-
F2		-	-	-	-	-	-	-	-	-	-	-	-	-	-	-	-	-	-	-	-	-	-	-	-	-	-	-	0.0588235	-	-	-	-	-	-	-	-	-	-	-	-	-	-	-	-	-	-	-	-
F2a		-	-	-	-	-	-	-	-	-	0.0588235	-	-	-	-	-	-	-	-	-	0.194444	-	-	-	-	0.285714	-	-	-	-	-	-	-	-	0.02	0.02	-	-	-	-	-	-	-	-	-	-	-	-	-
F2d		-	-	-	-	-	-	-	-	-	-	-	-	-	-	0.0212766	-	-	-	-	-	-	-	-	-	-	-	-	-	-	-	-	-	-	-	-	-	-	-	-	-	-	-	-	-	-	-	-	-
F2e		-	-	-	-	-	-	-	-	-	-	-	-	-	-	-	-	-	-	-	-	-	0.0232558	-	-	-	-	-	-	-	-	-	-	-	-	-	-	-	-	-	-	-	-	-	-	-	-	-	-
F2i		-	-	-	-	-	-	-	-	-	-	-	-	-	-	-	-	-	-	-	-	-	-	-	-	-	-	-	-	-	-	-	-	-	-	0.02	-	-	-	-	-	-	-	-	-	-	-	-	-
F3a1		-	-	-	-	-	-	-	-	-	-	0.0204082	-	-	-	0.0212766	-	0.0540541	-	0.0277778	0.138889	0.0487805	0.0232558	-	0.030303	0.0571429	0.0277778	-	-	-	-	-	-	-	-	-	-	-	-	-	-	-	-	-	-	-	-	-	-
F3b1a+16093C		-	-	-	-	-	-	-	-	-	-	-	-	-	-	-	-	-	-	-	-	-	-	-	-	-	-	-	-	-	-	-	-	0.06	0.02	-	0.128205	-	-	-	-	-	-	-	-	-	-	-	-
F3b1a1		-	-	-	-	-	-	-	-	-	-	-	-	-	-	-	-	-	-	-	-	-	-	-	-	-	-	-	-	-	-	-	-	-	-	-	-	-	-	-	-	-	-	0.0333333	-	-	-	-	-
F3b1a2		-	-	-	-	-	-	-	-	-	-	-	-	-	-	-	-	-	-	-	-	-	-	-	-	-	-	-	-	-	-	0.02	-	0.02	0.1	0.04	0.153846	0.2	-	-	0.0416667	-	-	-	-	-	-	-	-
F3b1b1		-	-	-	-	-	-	-	-	-	-	-	-	-	-	-	-	-	-	-	-	-	-	-	-	-	-	-	-	-	-	-	-	-	-	-	-	-	-	-	-	-	-	-	0.12	0.0689655	-	-	0.1
F4b1		-	-	-	-	-	-	-	-	-	-	-	-	-	-	-	-	-	-	-	-	-	-	-	-	-	-	-	-	-	-	0.02	0.22	0.18	-	0.02	-	-	0.125	-	0.0208333	-	-	-	-	-	-	-	-
G		-	-	-	-	-	-	-	-	-	-	-	-	-	-	-	-	-	-	-	-	-	0.139535	-	-	-	-	-	-	-	-	-	-	-	-	-	-	-	-	-	-	-	-	-	-	-	-	-	-
G1a1		-	-	-	-	-	-	-	-	-	-	-	-	-	-	-	-	-	-	-	-	-	0.0697674	-	-	-	-	-	-	-	-	-	-	-	-	-	-	-	-	-	-	-	-	-	-	-	-	-	-
G1a1b		-	-	-	-	-	-	-	-	-	-	-	-	-	-	-	-	-	-	-	-	-	-	-	-	-	-	-	-	-	-	-	-	-	-	0.02	-	-	-	-	-	-	-	-	-	-	-	-	-
G1c		-	-	-	-	-	-	-	-	-	-	-	-	-	-	-	-	-	-	-	-	-	-	-	-	-	-	-	-	-	-	-	-	-	-	-	-	-	-	-	-	-	-	-	-	-	-	-	-
G2a1+16189T!		-	-	-	-	-	-	-	-	-	-	-	-	-	-	-	-	0.027027	-	-	-	-	-	-	-	-	-	-	-	-	-	-	-	-	-	-	-	-	-	-	-	-	-	-	-	-	-	-	-
M10		-	-	-	-	-	-	-	-	-	-	-	-	-	-	-	-	-	0.176471	-	-	-	-	-	-	-	-	-	-	-	-	-	-	-	-	-	-	-	-	-	-	-	-	-	-	-	-	-	-
M10a1b		-	-	-	-	-	-	-	-	-	-	-	-	-	-	-	-	-	-	-	-	-	-	-	-	-	-	-	-	-	-	-	-	-	-	0.04	-	-	-	-	-	-	-	-	-	-	-	-	-
M11a2		-	-	-	-	-	-	-	-	-	-	-	-	-	-	-	-	-	-	-	-	-	-	-	0.030303	-	-	-	-	-	-	-	-	-	-	-	-	-	-	-	-	-	-	-	-	-	-	-	-
M12a		-	-	-	-	-	-	-	-	-	-	-	-	-	-	-	-	-	-	-	-	-	-	-	-	-	-	-	-	-	0.0434783	-	-	-	-	-	-	-	-	-	-	-	-	-	-	-	-	-	-
M12a1a		-	-	-	-	-	-	-	-	-	-	-	-	-	-	-	0.0416667	-	-	-	-	-	-	-	0.0909091	-	-	-	-	-	-	-	-	-	-	-	-	-	-	-	-	-	-	-	-	-	-	-	-
M12a1a1		-	-	-	-	-	-	-	-	-	-	-	-	-	-	0.0212766	-	-	-	-	-	0.0243902	-	-	-	-	-	-	-	-	-	-	-	-	-	-	-	-	-	-	-	-	-	-	-	-	-	-	-
M12a1b		-	-	0.0188679	0.115385	-	-	-	0.0227273	0.027027	-	-	-	-	-	-	-	-	-	-	-	-	-	-	-	-	-	-	-	-	-	-	-	-	-	-	-	-	-	-	-	-	-	-	-	-	-	-	-
M12a2		-	-	-	-	-	-	-	-	-	-	0.0204082	-	-	-	-	-	-	-	-	-	-	-	-	-	-	-	-	-	-	-	-	-	-	-	-	-	-	-	-	-	-	-	-	-	-	-	-	-
M12b1a		-	-	-	-	-	-	-	-	-	-	-	-	-	-	-	-	-	-	-	-	-	-	-	0.030303	-	-	-	-	-	-	-	-	-	-	-	-	-	-	-	-	-	-	-	-	-	-	-	-
M12b1a2		-	-	0.0188679	0.0384615	-	-	-	0.159091	-	0.0588235	-	-	-	-	-	-	-	-	-	-	-	-	-	-	-	-	-	-	-	-	-	-	-	-	-	-	-	-	-	-	-	-	-	-	-	-	-	-
M12b1b		0.0333333	-	-	-	-	-	-	-	-	-	-	-	-	-	-	-	-	-	-	-	-	-	-	-	-	-	-	-	0.0243902	-	-	-	-	-	-	-	-	-	-	-	-	-	-	-	-	-	-	-
M12b2a		-	-	0.0377358	0.0384615	0.195652	-	-	-	-	-	-	-	-	-	-	-	-	-	-	-	-	-	-	-	-	-	-	-	-	-	-	-	-	-	-	-	-	-	-	-	-	-	-	-	-	-	-	-
M13b1		0.0333333	-	-	-	-	0.027027	-	-	-	-	-	-	-	-	-	-	-	-	-	-	-	-	-	-	-	-	-	-	-	-	-	-	-	-	-	-	-	-	-	-	-	-	-	-	-	-	-	-
M17a		-	-	-	-	-	-	-	-	0.027027	-	-	-	-	-	-	-	-	-	-	-	-	-	-	-	-	-	-	0.176471	-	-	-	-	-	-	-	-	-	-	-	-	-	-	-	-	-	-	-	-
M17c		-	-	-	-	-	-	-	-	-	-	-	-	-	-	-	-	-	-	-	-	-	-	-	-	-	-	-	-	0.0243902	0.0434783	-	-	-	-	-	-	-	-	-	-	-	-	-	-	-	-	-	-
M17c1		-	-	-	-	-	-	-	-	-	-	-	-	-	-	-	-	-	-	-	-	-	-	-	-	-	-	-	-	-	-	-	-	-	-	-	-	-	-	-	-	0.0333333	-	-	-	-	-	-	-
M17c1a1		-	-	-	-	-	-	-	-	-	-	-	-	-	-	-	-	-	-	-	-	-	-	-	-	-	-	-	-	-	-	-	-	-	-	-	-	-	-	-	-	0.0333333	-	-	-	-	-	-	-
M17c1a1a		-	0.0555556	-	-	-	-	-	-	-	-	-	-	-	-	-	-	-	-	-	-	-	-	-	-	-	-	-	-	-	-	-	-	-	-	-	-	-	-	-	-	-	-	-	-	-	-	-	-
M19		-	-	-	0.0384615	-	-	-	-	-	-	-	-	-	-	-	-	-	-	-	-	-	-	-	-	-	-	-	-	-	-	-	-	-	-	-	-	-	-	-	-	-	-	-	-	-	-	-	-
M20		0.2	0.277778	0.0188679	-	-	0.0810811	-	0.0227273	-	-	-	-	0.148148	-	-	-	-	-	-	-	-	-	0.0322581	-	-	-	-	-	-	-	-	-	-	-	-	-	-	-	-	-	-	-	-	-	-	-	-	-
M21a		-	-	-	-	-	-	-	-	-	-	-	-	-	-	-	-	-	-	-	-	-	-	-	-	-	-	-	-	-	0.0434783	-	-	-	-	-	-	-	-	-	-	-	-	-	-	-	-	-	-
M21b		-	-	-	0.0769231	-	0.135135	0.0232558	-	0.162162	-	-	-	0.111111	0.0416667	-	-	-	-	-	-	-	-	-	-	-	-	-	-	-	-	-	-	-	-	-	-	-	-	-	-	-	-	-	-	-	-	-	-
M21b2		-	-	0.0188679	-	-	-	0.0232558	0.0454545	-	-	-	-	-	-	-	-	-	-	-	-	-	-	-	-	-	-	-	-	0.0243902	-	-	-	-	-	-	-	-	-	-	-	-	-	-	-	-	-	-	-
M22a		-	-	-	-	-	-	-	-	-	-	-	-	-	-	-	-	-	-	-	-	-	-	-	-	-	-	-	-	-	-	-	-	-	-	-	-	-	-	-	-	-	-	-	-	-	-	-	-
M23'75		-	0.0833333	-	-	-	-	-	-	-	-	-	-	-	-	-	-	-	-	-	-	-	-	-	0.030303	-	-	0.0344828	-	-	-	-	-	-	-	-	-	-	-	-	-	-	-	-	-	-	-	-	-
M24a		-	0.0277778	-	-	-	-	-	-	-	-	-	-	-	-	-	-	-	-	-	-	-	-	-	-	-	-	-	-	-	0.0434783	-	-	-	-	-	-	-	-	-	-	-	-	-	-	-	-	-	-
M24b		-	-	-	-	-	-	-	-	0.351351	-	-	-	-	0.0416667	-	-	-	-	-	-	-	-	-	-	-	-	-	-	0.0243902	-	-	-	-	-	-	-	-	-	-	-	-	-	-	-	-	-	-	-
M26		-	-	-	-	-	-	-	-	-	-	-	-	-	-	-	-	-	-	-	-	-	-	-	-	-	-	-	-	0.0243902	-	-	-	-	-	-	-	-	-	-	-	-	-	-	-	-	-	-	-
M5		-	-	-	-	-	-	-	-	-	-	-	-	-	-	-	0.0416667	-	-	-	-	-	-	-	-	-	-	-	-	-	-	-	-	-	-	-	-	-	-	-	-	-	-	-	-	-	-	-	-
M50a		-	-	-	-	-	-	-	-	-	-	-	-	-	-	-	-	-	-	-	-	-	-	-	-	-	-	-	-	-	0.0434783	-	-	-	-	-	-	-	-	-	-	-	-	-	-	-	-	-	-
M50a2		-	-	0.0188679	-	-	-	-	-	-	-	-	-	-	-	-	-	-	-	-	-	-	-	-	-	-	-	-	-	-	-	-	-	-	-	-	-	-	-	-	-	-	-	-	-	-	-	-	-
M51a		-	-	-	-	0.152174	-	-	-	0.027027	-	-	-	-	-	-	-	-	-	-	-	-	-	-	-	-	-	-	-	0.0243902	-	-	-	-	-	-	-	-	-	-	-	-	-	-	-	-	-	-	-
M51a1a		-	-	-	-	-	-	-	-	-	-	-	-	-	-	-	-	-	-	-	-	-	-	-	-	-	-	-	-	-	-	-	-	-	-	-	-	-	-	-	-	-	-	-	-	-	-	-	-
M51a1b		-	-	-	-	-	-	-	-	-	-	-	-	-	-	-	-	-	-	-	-	-	-	-	-	-	-	-	-	0.0243902	-	-	-	-	-	-	-	-	-	-	-	-	-	-	-	-	-	-	-
M51b		-	-	-	0.0384615	0.130435	-	-	-	-	-	-	-	-	-	-	-	-	-	-	-	-	-	-	-	-	-	-	-	-	0.0434783	-	-	-	-	-	-	-	-	-	-	-	-	-	-	-	-	-	-
M51b1b		-	-	0.0754717	0.0384615	-	-	-	-	-	-	-	-	-	-	-	-	-	-	-	-	-	-	-	-	-	-	-	-	-	-	-	-	-	-	-	-	-	-	-	-	-	-	-	-	-	-	-	-
M59		-	-	-	-	-	-	-	-	-	-	0.0204082	-	-	-	-	-	-	-	-	-	-	-	-	-	-	-	-	-	-	-	-	-	-	-	-	-	-	-	-	-	-	-	-	-	-	-	-	-
M61		-	-	-	-	-	-	-	-	-	-	-	0.0277778	-	-	-	-	0.0810811	-	-	-	-	-	-	-	-	-	-	-	-	-	-	-	-	-	-	-	-	-	-	-	-	-	-	-	-	-	-	-
M68a1a		-	-	0.0188679	0.115385	0.108696	-	-	-	-	-	-	-	-	0.125	-	-	-	-	-	-	-	-	-	-	-	-	-	-	0.0487805	-	-	-	-	-	-	-	-	-	-	-	-	-	-	-	-	-	-	-
M69		-	-	-	-	-	-	-	-	-	-	-	-	-	-	-	-	-	-	-	-	-	-	-	-	-	-	-	-	-	-	-	-	-	-	-	-	-	-	-	-	-	-	-	-	-	-	-	-
M70		-	-	-	-	-	-	-	-	-	-	-	-	-	-	-	-	-	-	-	-	-	-	0.0322581	-	-	-	-	-	-	-	-	-	-	-	-	-	-	-	-	-	-	-	-	-	-	-	-	-
M71+151T		-	-	-	-	-	-	0.348837	-	0.027027	-	-	-	0.37037	0.416667	-	-	-	-	-	-	-	-	-	-	-	-	-	-	-	-	-	-	-	-	-	-	-	-	-	-	-	-	-	-	-	-	-	-
M71a1a		-	-	-	-	-	-	-	-	-	-	0.0204082	0.416667	-	-	-	-	-	-	-	-	-	-	-	-	-	-	-	-	-	-	-	-	-	-	-	-	-	-	-	-	-	-	-	-	-	-	-	-
M71a2		-	-	-	-	-	-	0.0232558	-	-	-	-	-	-	-	-	-	-	-	-	-	-	-	-	-	-	-	-	-	-	-	-	-	-	-	-	-	-	-	-	-	-	-	-	-	-	-	-	-
M71c		-	-	-	-	-	-	-	-	-	-	0.0204082	-	-	-	-	-	-	-	-	-	-	-	-	-	-	-	-	-	-	-	-	-	-	-	-	-	-	-	-	-	-	-	-	-	-	-	-	-
M72a		-	-	-	0.0384615	-	-	-	-	0.027027	-	-	-	-	-	-	-	-	-	-	-	-	-	-	-	-	-	-	-	-	0.0434783	-	-	-	-	-	-	-	-	-	-	-	-	-	-	-	-	-	-
M73		-	-	0.0943396	-	-	-	-	-	-	-	-	-	-	-	-	-	-	-	-	-	-	-	-	-	-	-	-	-	-	-	-	-	-	-	-	-	-	-	-	-	-	-	-	-	-	-	-	-
M73b		0.1	0.0555556	-	-	-	0.135135	-	-	-	-	-	-	0.037037	0.0416667	-	-	-	-	-	-	-	-	-	-	-	-	-	-	-	-	-	-	-	-	-	-	-	-	-	-	-	-	-	-	-	-	-	-
M74		-	-	-	-	-	0.0540541	-	-	-	-	-	-	-	-	-	0.0416667	-	-	-	-	-	-	-	-	-	-	-	-	-	-	-	-	-	-	-	-	-	-	-	-	-	-	-	-	-	-	-	-
M74a		-	-	-	-	-	-	-	-	-	-	-	0.0277778	-	-	-	-	0.027027	0.0588235	-	-	0.0487805	-	-	-	-	-	-	-	-	-	-	-	-	-	-	-	-	-	-	-	-	-	-	-	-	-	-	-
M74b		-	-	-	-	-	-	-	-	-	-	-	-	-	-	-	-	-	-	-	-	-	-	-	-	0.0285714	-	-	-	0.0487805	-	-	-	-	-	-	-	-	-	-	-	-	-	-	-	-	-	-	-
M74b1		-	-	0.150943	-	-	-	0.116279	-	-	-	-	-	-	0.0416667	-	-	-	-	-	-	-	-	-	-	-	-	-	-	-	-	-	-	-	-	-	-	-	-	-	-	-	-	-	-	-	-	-	-
M74b2		-	-	-	-	-	0.0810811	-	-	-	-	0.0204082	-	0.0740741	-	-	-	-	-	-	-	-	-	-	-	-	-	-	-	-	0.0434783	-	-	-	-	-	-	-	-	-	-	-	-	-	-	-	-	-	-
M76		-	-	-	0.0384615	-	0.027027	-	0.136364	-	-	-	-	-	-	-	-	-	-	-	-	-	-	-	-	-	-	-	-	0.097561	-	-	-	-	-	-	-	-	-	-	-	-	-	-	-	-	-	-	-
M77		-	-	-	-	-	-	-	-	0.0540541	-	-	-	-	-	-	-	-	-	-	-	-	-	-	-	-	-	-	-	-	-	-	-	-	-	-	-	-	-	-	-	-	-	-	-	-	-	-	-
M79		-	-	-	-	-	-	-	-	0.0540541	-	-	-	-	-	-	-	-	-	-	-	-	-	-	-	-	-	-	-	-	-	-	-	-	-	-	-	-	-	-	-	-	-	-	-	-	-	-	-
M7b1a1		-	-	-	-	-	-	-	-	-	-	-	-	-	-	0.0851064	-	0.0810811	-	-	-	-	-	0.0322581	-	-	-	-	-	0.0243902	-	-	-	-	-	0.04	-	-	-	-	-	-	-	-	-	-	-	-	-
M7b1a1+(16192T)		-	-	-	-	-	-	-	-	-	-	0.0408163	-	-	-	0.0425532	0.0833333	0.027027	-	-	-	-	-	-	-	-	-	-	-	-	-	-	-	-	-	-	-	-	-	-	-	-	-	-	-	-	-	-	-
M7b1a1a		-	-	-	-	-	0.027027	-	-	-	-	-	-	0.037037	-	-	-	-	-	-	-	-	-	-	-	-	-	-	-	-	-	-	-	-	-	-	-	-	-	-	-	-	-	-	-	-	-	-	-
M7b1a1a2		-	-	-	-	-	-	-	-	-	-	0.0408163	-	-	-	-	-	-	-	-	-	-	-	-	-	-	-	0.0689655	-	0.0243902	-	-	-	-	-	-	-	-	-	-	-	-	-	-	-	-	-	-	-
M7b1a1a3		-	-	-	-	-	-	-	-	-	-	0.0204082	-	-	-	0.0425532	-	0.108108	-	0.0277778	0.0555556	-	-	-	-	0.114286	-	-	-	-	-	-	-	-	-	-	-	-	-	-	-	-	-	-	-	-	-	-	-
M7b1a1b		-	-	-	-	-	-	0.0232558	-	-	-	0.0204082	-	-	-	-	-	-	-	-	-	-	-	-	-	-	-	-	-	-	-	-	-	-	-	0.02	-	-	-	-	-	-	-	-	-	-	-	-	-
M7b1a1d1		-	-	-	-	-	-	-	-	-	-	-	-	-	-	0.0212766	-	0.0540541	-	-	-	-	-	-	-	-	-	-	-	-	-	-	-	-	-	-	-	-	-	-	-	-	-	-	-	-	-	-	-
M7b1a1f		-	-	0.0377358	-	-	-	0.0232558	-	-	-	-	-	-	-	-	-	-	-	-	-	-	-	-	-	-	-	-	-	-	-	-	-	-	-	-	-	-	-	-	-	-	-	-	-	-	-	-	-
M7b1a1h		-	-	-	-	-	-	-	-	-	-	-	-	-	-	-	-	-	0.0882353	-	-	-	-	-	-	-	-	-	-	-	-	-	-	-	-	-	-	-	-	-	-	-	-	-	-	-	-	-	-
M7b1a1i		-	-	-	-	-	-	-	-	-	-	-	-	-	-	-	-	-	-	-	-	-	-	-	-	-	-	-	-	-	-	0.12	-	-	-	-	-	-	-	-	-	-	-	-	-	-	-	-	-
M7b1a1i1		-	-	-	-	-	-	-	-	-	-	-	-	-	-	-	-	-	-	-	-	-	-	-	-	-	-	-	-	-	-	0.1	-	-	-	-	-	-	-	-	-	-	-	-	-	-	-	-	-
M7b1a2a1		-	-	-	-	-	-	-	-	-	-	-	-	-	-	-	-	-	-	-	-	-	-	-	-	-	-	-	-	-	-	-	0.1	-	0.1	0.08	-	-	0.0833333	0.0454545	-	0.0333333	0.0454545	-	-	-	-	-	-
M7b1a2a1a		-	-	-	-	-	-	-	-	-	-	-	-	-	-	-	-	-	-	-	-	-	-	-	-	-	-	-	-	-	-	-	0.06	-	-	-	-	-	0.208333	-	-	-	-	-	-	-	-	-	-
M7b1a2a1b		-	-	-	-	-	-	-	-	-	-	-	-	-	-	-	-	-	-	-	-	-	-	-	-	-	-	-	-	-	-	-	0.02	-	-	-	-	-	-	-	-	-	-	-	-	-	-	-	-
M7b1a2a1b1		-	-	-	-	-	-	-	-	-	-	-	-	-	-	-	-	-	-	-	-	-	-	-	-	-	-	-	-	-	-	-	0.22	-	-	-	-	-	0.0833333	-	-	-	-	-	-	-	-	-	-
M7c1a		-	-	-	-	-	-	-	0.0227273	-	0.176471	0.0408163	-	-	-	-	0.0416667	-	-	-	-	-	-	-	-	-	-	-	-	-	-	-	-	-	-	-	-	-	-	-	-	-	-	-	-	-	-	-	-
M7c1a4b		-	-	-	-	-	-	-	-	-	-	-	-	-	-	-	-	-	-	-	-	-	-	-	-	-	-	-	-	-	-	-	-	-	-	-	-	-	-	-	0.104167	-	-	-	-	-	-	-	-
M7c1b2b		-	-	-	-	-	-	-	-	-	-	-	-	-	-	-	-	-	-	-	-	-	-	-	-	-	-	-	-	-	-	-	-	-	-	-	-	-	-	-	-	-	-	-	-	-	-	-	-
M7c1c1		-	-	-	-	-	-	-	-	-	-	-	-	-	-	-	-	-	-	-	-	-	-	-	-	-	-	-	-	-	-	0.08	-	0.04	-	-	-	-	-	-	-	-	-	-	-	-	-	-	-
M7c1c1a1		-	-	-	-	-	-	-	-	-	-	-	-	-	-	-	-	-	-	-	-	-	-	-	-	-	-	-	-	-	-	-	-	-	-	-	0.025641	-	-	-	-	-	-	-	-	-	0.111111	-	-
M7c1c2		-	0.0277778	-	-	-	-	-	-	-	-	0.0408163	-	-	-	-	0.0416667	0.027027	-	-	-	-	-	-	-	-	0.0277778	-	-	-	-	-	-	-	-	-	-	-	-	-	-	-	-	-	-	-	-	-	-
M7c1c2a		-	-	-	-	-	-	-	-	-	-	-	-	-	-	-	-	-	-	0.0833333	-	-	-	-	-	-	-	-	-	-	-	-	-	-	0.02	-	-	-	-	-	-	-	-	-	-	-	-	-	-
M7c1c3		-	-	-	-	-	-	-	-	-	-	-	-	-	-	-	-	-	-	-	-	-	-	-	-	-	-	-	-	-	0.0434783	0.02	-	0.02	0.12	0.02	0.0769231	0.06	-	-	-	0.0666667	-	0.366667	0.16	0.137931	-	-	-
M7c1c3a		-	-	-	-	-	-	-	-	-	-	-	-	-	-	-	-	-	-	-	-	-	-	-	-	-	-	-	-	-	-	-	-	-	-	-	-	-	-	-	-	-	-	-	-	-	-	-	-
M7c1c3a1		-	-	-	-	-	-	-	-	-	-	-	-	-	-	-	-	-	-	-	-	-	-	-	-	-	-	-	-	-	-	-	-	-	-	-	-	-	-	0.0454545	-	-	-	-	-	-	-	-	-
M7c1c3b		-	-	-	-	-	-	-	-	-	-	-	-	-	-	-	-	-	-	-	-	-	-	-	-	-	-	-	-	-	-	-	-	-	-	-	-	-	-	-	-	-	-	-	-	-	-	-	-
M7c1c3d		-	-	-	-	-	-	-	-	-	-	-	-	-	-	-	-	-	-	-	-	-	-	-	-	-	-	-	-	-	-	-	-	-	-	-	-	-	-	-	-	-	-	-	-	-	-	-	-
M7c1c3e		-	-	-	-	-	-	-	-	-	-	-	-	-	-	-	-	-	-	-	-	-	-	-	-	-	-	-	-	-	-	-	-	-	-	-	-	-	-	-	-	-	-	-	-	-	-	-	-
M7c1c3f		-	-	-	-	-	-	-	-	-	-	-	-	-	-	-	-	-	-	-	-	-	-	-	-	-	-	-	-	-	-	-	-	-	-	-	-	-	-	-	-	-	-	-	-	-	-	0.115385	0.0333333
M7c1c3g		-	-	-	-	-	-	-	-	-	-	-	-	-	-	-	-	-	-	-	-	-	-	-	-	-	-	-	-	-	-	-	-	-	-	-	-	-	-	-	-	-	-	-	0.04	-	-	0.115385	-
M7c1c3h		-	-	-	-	-	-	-	-	-	-	-	-	-	-	-	-	-	-	-	-	-	-	-	-	-	-	-	-	-	-	-	-	-	-	-	-	-	-	-	-	-	-	-	0.08	-	-	0.230769	-
M7c1c3i		-	-	-	-	-	-	-	-	-	-	-	-	-	-	-	-	-	-	-	-	-	-	-	-	-	-	-	-	-	-	-	-	-	-	-	-	-	-	-	-	-	-	-	0.08	0.137931	-	-	0.166667
M7c2		-	-	-	-	-	-	-	-	-	-	-	-	-	-	-	-	-	-	-	-	-	-	-	-	-	-	-	-	-	-	-	-	-	-	0.02	-	-	-	-	-	-	-	-	-	-	-	-	-
M7c2a		-	-	-	-	-	-	-	-	-	-	-	-	-	-	-	0.0416667	-	0.0588235	-	-	-	-	-	-	-	-	-	-	-	-	-	-	-	-	-	-	-	-	-	-	-	-	-	-	-	-	-	-
M7c3		-	-	-	-	-	-	-	-	-	-	-	-	-	-	-	-	-	-	-	-	-	-	-	-	-	-	-	-	-	-	0.04	-	-	-	-	-	-	-	-	-	-	-	-	-	-	-	-	-
M8a2e		-	-	-	-	-	-	-	-	-	-	-	-	-	-	-	-	-	-	-	-	-	-	-	-	-	-	-	-	-	-	0.02	-	-	-	-	-	-	-	-	-	-	-	-	-	-	-	-	-
M9a'b		0.0666667	0.0555556	-	-	-	0.027027	-	-	-	-	-	-	-	-	-	-	-	-	-	-	-	-	-	-	-	-	-	-	-	-	-	-	-	-	-	-	-	-	-	-	-	-	-	-	-	-	-	-
M9a1a3		0.0666667	-	-	-	-	-	-	-	-	-	-	-	-	-	-	-	-	-	-	-	-	-	-	-	-	-	-	-	-	-	-	-	-	-	-	-	-	-	-	-	-	-	-	-	-	-	-	-
M9a4a1		-	-	-	-	-	-	-	-	-	-	-	-	-	-	-	-	-	-	-	-	-	-	-	-	0.0285714	-	-	-	-	-	-	-	-	-	-	-	-	-	-	-	-	-	-	-	-	-	-	-
M9a4a2		-	-	-	-	-	-	-	-	-	-	-	-	-	-	-	-	-	-	-	-	-	-	-	-	-	-	-	-	0.0243902	-	-	-	-	-	-	-	-	-	-	-	-	-	-	-	-	-	-	-
M9a5		-	-	-	-	-	-	-	-	-	-	-	-	-	-	0.0212766	-	-	-	-	-	-	-	-	-	-	-	-	-	-	-	-	-	-	-	-	-	-	-	-	-	-	-	-	-	-	-	-	-
N11a2		-	-	-	-	-	-	-	-	-	-	-	-	-	-	-	-	-	-	-	-	-	-	-	-	-	-	-	-	-	-	-	-	-	-	0.02	-	-	-	-	-	-	-	-	-	-	-	-	-
N11b		-	-	-	-	-	-	-	-	-	-	-	-	-	-	-	-	-	-	-	-	-	-	-	-	-	-	-	-	-	-	-	-	-	-	-	-	-	-	-	-	-	-	-	-	-	-	-	-
N21+195T!		-	-	0.0377358	-	-	-	-	-	-	-	-	-	0.0740741	-	-	-	-	-	-	-	-	-	-	0.0606061	-	-	-	-	-	-	-	-	-	-	-	-	-	-	-	-	-	-	-	-	-	-	-	-
N21a		-	-	-	-	-	0.0540541	-	-	-	-	-	-	-	-	-	-	-	-	-	-	-	-	-	-	-	-	-	-	-	-	-	-	-	-	-	-	-	-	-	-	-	-	-	-	-	-	-	-
N22		-	-	0.0754717	0.0384615	-	-	-	0.0681818	-	-	-	-	-	-	-	-	-	-	-	-	-	-	-	-	-	-	-	-	-	0.0869565	-	-	-	-	-	-	-	-	-	-	-	-	-	-	-	-	-	-
N22a		-	-	-	-	-	-	-	-	-	-	-	-	-	-	-	-	-	-	-	-	-	-	-	-	-	-	-	-	-	-	-	-	-	-	-	-	-	-	-	-	-	-	-	-	-	-	-	-
N7b		-	-	-	-	-	-	-	0.0227273	-	-	-	-	-	-	-	-	-	-	-	-	-	-	-	-	-	-	-	-	0.0243902	-	-	-	-	-	-	-	-	-	-	-	-	-	-	-	-	-	-	-
N8		-	-	-	-	-	-	0.0465116	-	-	-	-	-	-	-	-	-	-	-	-	-	-	-	-	-	-	-	-	0.0588235	-	-	-	-	-	-	-	-	-	-	-	-	-	-	-	-	-	-	-	-
N9a1		-	-	-	-	-	-	-	-	-	-	-	-	-	-	0.0425532	-	-	-	-	-	-	-	-	-	-	-	-	-	-	-	-	-	-	-	-	-	-	-	-	-	-	-	-	-	-	-	-	-
N9a10+16311T!		-	-	-	-	-	-	-	-	-	-	-	-	-	-	-	0.0416667	0.027027	0.0294118	-	-	0.170732	-	-	-	-	-	-	0.0588235	-	-	-	-	-	-	-	-	-	-	-	-	-	-	-	-	-	-	-	-
N9a10a2a		-	-	-	-	-	-	-	-	-	-	-	-	-	-	-	-	-	-	-	-	-	-	-	-	-	-	-	-	-	-	-	0.06	-	-	-	-	-	-	-	-	-	-	-	-	-	-	-	-
N9a6		-	-	0.113208	0.0769231	-	-	-	-	-	0.0588235	-	-	-	-	-	-	0.0540541	-	-	-	-	-	-	-	-	-	-	-	-	-	-	-	-	-	-	-	-	-	-	-	-	-	-	-	-	-	-	-
N9a6a		-	-	-	-	-	-	-	-	-	-	-	-	-	-	-	-	-	-	-	-	-	-	-	-	-	-	-	-	-	0.0869565	-	-	-	-	-	-	-	-	-	-	-	-	-	-	-	-	-	-
N9a6b		-	-	-	-	-	-	-	-	-	-	-	-	-	-	-	-	-	-	-	-	-	-	-	-	-	-	-	-	-	-	-	-	-	-	-	-	-	-	-	-	-	-	-	-	-	-	-	-
P10		-	-	-	-	-	-	-	-	-	-	-	-	-	-	-	-	-	-	-	-	-	-	-	-	-	-	-	-	-	-	-	-	-	-	-	-	-	-	-	-	-	-	0.0666667	-	-	-	-	-
P1d1		-	-	-	-	-	-	-	-	-	-	-	-	-	-	-	-	-	-	-	-	-	-	-	-	-	-	-	-	-	-	-	-	-	-	-	-	-	-	-	-	-	-	-	-	-	-	-	-
P9		-	-	-	-	-	-	-	-	-	-	-	-	-	-	-	-	-	-	-	-	-	-	-	-	-	-	-	-	-	-	-	-	-	-	-	-	-	-	-	-	-	0.136364	-	-	-	-	-	-
P9a		-	-	-	-	-	-	-	-	-	-	-	-	-	-	-	-	-	-	-	-	-	-	-	-	-	-	-	-	-	-	-	-	-	-	-	-	-	-	-	-	-	0.272727	-	-	-	-	-	-
Q1d		-	-	-	-	-	-	-	-	-	-	-	-	-	-	-	-	-	-	-	-	-	-	-	-	-	-	-	-	-	-	-	-	-	-	-	-	-	0.0833333	-	-	-	-	-	-	-	-	-	-
Q3		-	-	-	-	-	-	-	-	-	-	-	-	-	-	-	-	-	-	-	-	-	-	-	-	-	-	-	-	-	0.0434783	-	-	-	-	-	-	-	-	-	-	-	-	-	-	-	-	-	-
R		-	-	-	-	-	-	-	-	-	-	-	-	-	-	-	-	-	-	-	-	-	-	-	-	-	-	-	-	-	-	-	-	-	-	0.04	-	-	-	-	-	-	-	-	-	-	-	-	-
R11b1		-	-	-	-	-	-	-	-	-	-	0.0204082	-	-	-	-	-	-	-	-	-	-	-	-	-	-	-	-	-	-	-	-	-	-	-	-	-	-	-	-	-	-	-	-	-	-	-	-	-
R22		-	-	0.0188679	-	-	-	-	0.159091	-	-	-	-	-	-	-	-	-	-	-	-	-	-	-	-	-	-	-	-	0.0487805	-	-	-	-	-	-	-	-	-	-	-	-	-	-	-	-	-	-	-
R23		-	-	0.0188679	0.0384615	0.0217391	-	-	-	-	-	-	-	-	-	-	-	-	-	-	-	-	-	-	-	-	-	-	-	-	-	-	-	-	-	-	-	-	-	-	-	-	-	-	-	-	-	-	-
R24		-	-	-	-	-	-	-	-	-	-	-	-	-	-	-	-	-	-	-	-	-	-	-	-	-	-	-	-	-	-	-	-	-	-	-	-	-	-	-	-	-	-	-	-	-	-	-	-
R24a		-	-	-	-	-	-	-	-	-	-	-	-	-	-	-	-	-	-	-	-	-	-	-	-	-	-	-	-	-	-	-	-	-	-	-	-	-	-	-	-	0.0333333	-	-	-	-	-	-	-
R9b1		-	-	-	-	-	-	-	-	-	-	-	-	-	-	-	-	-	-	-	-	-	-	0.0322581	-	-	-	-	-	-	-	-	-	-	-	-	-	-	-	-	-	-	-	-	-	-	-	-	-
R9b1a1		-	-	-	-	-	-	-	-	-	-	-	-	-	-	-	-	-	-	-	-	-	-	-	-	-	-	-	-	-	-	-	-	-	-	-	-	-	-	-	-	-	-	-	-	-	-	-	-
R9b1a1a		-	0.0555556	0.0377358	-	-	-	-	-	-	-	-	-	0.037037	-	-	-	-	-	-	-	-	-	-	-	-	-	-	-	-	-	-	-	-	-	-	-	-	-	-	-	-	-	-	-	-	-	-	-
R9b1a2		-	-	-	-	-	-	-	-	-	-	-	-	-	-	-	-	-	-	-	-	-	-	-	-	-	-	-	-	-	-	-	-	-	-	-	-	-	-	-	0.0416667	-	-	-	-	-	-	-	-
R9b1a2a		-	-	-	-	-	-	-	-	-	-	-	-	-	-	0.0212766	-	-	-	-	-	-	-	-	-	-	-	-	-	-	-	-	-	-	-	-	-	-	-	-	-	-	-	-	-	-	-	-	-
R9b1a2b		-	-	-	-	-	-	-	-	-	-	-	-	-	-	0.0212766	-	-	-	-	-	-	-	-	-	-	-	-	-	-	-	-	-	-	-	-	-	-	-	-	-	-	-	-	-	-	-	-	-
R9b1a3		-	-	-	-	-	-	-	-	-	-	-	-	-	-	-	-	0.027027	-	-	-	-	0.0465116	-	-	-	-	-	-	-	-	-	-	-	-	-	-	-	-	-	-	-	-	-	-	-	-	-	-
R9b2		-	-	-	-	-	-	-	-	-	-	-	0.0555556	-	-	-	-	-	-	-	-	-	-	-	-	-	-	-	-	-	-	-	-	-	-	-	-	-	-	-	-	-	-	-	-	-	-	-	-
R9c1a		-	-	-	-	-	-	-	-	-	-	-	-	-	-	-	-	-	-	-	-	-	-	-	-	-	-	-	-	-	-	-	-	-	-	0.04	-	-	-	-	-	-	-	-	-	-	0.111111	-	-
R9c1a1		-	-	-	-	-	-	-	-	-	-	-	-	-	-	-	-	-	-	-	-	-	-	-	-	-	-	-	-	-	-	-	-	-	-	0.04	0.025641	0.04	-	-	-	-	-	-	-	-	-	-	-
R9c1a2		-	-	-	-	-	-	-	-	-	-	-	-	-	-	-	-	-	-	-	-	-	-	-	-	-	-	-	-	-	-	-	-	0.02	-	-	-	-	-	-	0.229167	-	-	-	-	-	-	-	-
R9c1b1		-	-	-	-	-	-	-	-	-	-	0.0204082	-	-	-	-	-	-	-	-	-	-	0.0232558	-	-	-	-	-	-	-	-	-	-	-	-	-	-	-	-	-	-	-	-	-	-	-	-	-	-
R9c1b2		-	-	-	-	-	-	-	-	-	-	-	-	-	-	-	-	-	-	-	-	-	-	-	-	-	-	-	-	-	-	-	-	-	-	0.02	-	-	-	-	-	-	-	0.0333333	-	0.0689655	-	-	-
Y2a		-	-	-	-	-	-	-	-	-	-	-	-	-	-	-	-	-	-	-	-	-	-	-	-	-	-	-	-	-	-	-	0.04	-	-	-	-	-	0.0416667	-	-	-	-	-	-	-	-	-	-
Y2a1		-	-	-	-	-	-	-	-	-	-	-	-	-	-	-	-	-	-	-	-	-	-	-	-	-	-	-	-	-	-	-	-	-	-	-	-	-	-	-	-	-	-	0.2	-	-	0.0740741	-	-
Y2a1a		-	-	-	-	-	-	-	-	-	-	-	-	-	-	-	-	-	-	-	-	-	-	-	-	-	-	-	-	-	-	-	-	-	-	-	-	-	-	-	-	-	-	-	-	0.0689655	-	-	0.166667
Z3a1a		-	-	-	-	-	-	-	-	-	-	-	-	-	-	-	-	-	-	-	-	-	-	-	0.030303	-	-	-	-	-	-	-	-	-	-	-	-	-	-	-	-	-	-	-	-	-	-	-	-
Z3c		0.0333333	-	-	-	-	-	-	-	-	-	-	-	-	-	-	-	-	-	-	-	-	-	-	-	-	-	-	-	-	-	-	-	-	-	-	-	-	-	-	-	-	-	-	-	-	-	-	-
[truncated: 9 more columns]
